# Supplementary material
Source: PubMed Central journal article supplement (PMC8489679)
Supplement: NIHMS1736010-supplement-2.pdf [file NIHMS1736010-supplement-2.pdf]

**Supplementary Table 1. Detailed Demographic Characteristics of Subjects**

|                                                | Group   | Age (years) | Race  | Gender | PMI (hours) | Brain pH | Cause of Death                    | Psychotropic Drugs (at the time of death) | Psychiatric Diagnosis    |
|------------------------------------------------|---------|-------------|-------|--------|-------------|----------|-----------------------------------|-------------------------------------------|--------------------------|
| <b>Normal Control Subjects <sup>a</sup></b>    |         |             |       |        |             |          |                                   |                                           |                          |
| 1.                                             | CONTROL | 19          | Black | Male   | 11          | 6.9      | GSW                               | None                                      | Normal                   |
| 2.                                             | CONTROL | 22          | Black | Male   | 19          | 6.9      | GSW                               | None                                      | Normal                   |
| 3.                                             | CONTROL | 42          | White | Female | 23          | 7.2      | Pneumonia                         | None                                      | Normal                   |
| 4.                                             | CONTROL | 37          | Black | Male   | 5           | 7.1      | ASCVD                             | None                                      | Normal                   |
| 5.                                             | CONTROL | 31          | Black | Male   | 8           | 7.2      | GSW                               | None                                      | Normal                   |
| 6.                                             | CONTROL | 46          | Black | Male   | 9           | 7.1      | Multiple injuries                 | None                                      | Normal                   |
| 7.                                             | CONTROL | 33          | White | Male   | 15          | 7.0      | GSW                               | None                                      | Normal                   |
| 8.                                             | CONTROL | 48          | White | Male   | 26          | 6.9      | ASCVD                             | None                                      | Normal                   |
| 9.                                             | CONTROL | 40          | White | Female | 7           | 7.0      | ASCVD                             | None                                      | Normal                   |
| 10.                                            | CONTROL | 23          | Black | Male   | 15          | 6.8      | GSW                               | None                                      | Normal                   |
| 11.                                            | CONTROL | 83          | White | Male   | 20          | 7.1      | ASCVD                             | None                                      | Normal                   |
| 12.                                            | CONTROL | 65          | Black | Female | 23          | 6.9      | ASCVD                             | None                                      | Normal                   |
| 13.                                            | CONTROL | 35          | White | Male   | 24          | 6.9      | Crush injury to abdomen and chest | None                                      | Normal                   |
| 14.                                            | CONTROL | 52          | White | Male   | 30          | 7.3      | ASCVD                             | None                                      | Normal                   |
| 15.                                            | CONTROL | 37          | White | Male   | 24          | 7.0      | ASCVD                             | None                                      | Normal                   |
| 16.                                            | CONTROL | 45          | White | Male   | 22          | 7.3      | ASCVD                             | None                                      | Normal                   |
| 17.                                            | CONTROL | 26          | White | Male   | 12          | 6.9      | Arrhythmia                        | None                                      | Normal                   |
| 18.                                            | CONTROL | 47          | White | Male   | 10          | 7.0      | ASCVD                             | None                                      | Normal                   |
| 19.                                            | CONTROL | 31          | White | Male   | 16          | 7.2      | MVA                               | None                                      | Normal                   |
| 20.                                            | CONTROL | 60          | White | Male   | 15          | 7.1      | Accidental drowning               | None                                      | Normal                   |
| 21.                                            | CONTROL | 28          | White | Male   | 13          | 6.8      | Electrocution                     | None                                      | Normal                   |
| 22.                                            | CONTROL | 45          | White | Female | 16          | 6.9      | Cardiac arrhythmia                | None                                      | Normal                   |
| 23.                                            | CONTROL | 62          | White | Male   | 19          | 7.0      | Cardiac arrest                    | None                                      | Normal                   |
| 24.                                            | CONTROL | 53          | White | Male   | 15          | 6.9      | ASCVD                             | None                                      | Normal                   |
| <b>Depressed Suicide Subjects <sup>b</sup></b> |         |             |       |        |             |          |                                   |                                           |                          |
| 1.                                             | SUICIDE | 27          | White | Male   | 24          | 7.0      | GSW                               | None                                      | MDD, Ethanol abuse       |
| 2.                                             | SUICIDE | 44          | White | Female | 11          | 7.2      | Drug overdose                     | Nortriptyline                             | MDD, Ethanol abuse       |
| 3.                                             | SUICIDE | 36          | White | Female | 10          | 7.1      | GSW                               | None                                      | MDD                      |
| 4.                                             | SUICIDE | 24          | White | Male   | 7           | 7.1      | GSW                               | Ethanol                                   | MDD                      |
| 5.                                             | SUICIDE | 43          | White | Male   | 12          | 7.0      | Drug Overdose                     | None                                      | MDD, Polysubstance Abuse |
| 6.                                             | SUICIDE | 53          | White | Male   | 23          | 6.9      | Jumped from height                | None                                      | MDD                      |

|     |         |    |       |        |    |     |                                            |                                                    |                                         |
|-----|---------|----|-------|--------|----|-----|--------------------------------------------|----------------------------------------------------|-----------------------------------------|
| 7.  | SUICIDE | 41 | White | Female | 27 | 7.1 | Drug Overdose                              | Amitriptyline, Desipramine, Nortriptyline, Ethanol | MDD, Ethanol abuse                      |
| 8.  | SUICIDE | 22 | Black | Female | 16 | 7.3 | Drug overdose                              | None                                               | MDD                                     |
| 9.  | SUICIDE | 46 | White | Female | 21 | 6.9 | Drug overdose                              | Amitriptyline, Desipramine, Ethanol                | MDD                                     |
| 10. | SUICIDE | 36 | White | Female | 18 | 7.2 | GSW                                        | None                                               | MDD                                     |
| 11. | SUICIDE | 38 | White | Male   | 24 | 7.0 | Drug overdose & Ethanol overdose           | Ethanol                                            | MDD, Ethanol abuse                      |
| 12. | SUICIDE | 46 | White | Female | 16 | 6.8 | Drug overdose / Nortriptyline Intoxication | Nortriptyline                                      | MDD, Panic disorder with agoraphobia    |
| 13. | SUICIDE | 23 | White | Male   | 12 | 7.0 | Hanging                                    | Paroxetine                                         | MDD                                     |
| 14. | SUICIDE | 18 | White | Male   | 17 | 6.3 | Hanging                                    | None                                               | MDD                                     |
| 15. | SUICIDE | 30 | White | Male   | 17 | 7.1 | Hanging                                    | Venlafaxine                                        | MDD                                     |
| 16. | SUICIDE | 19 | White | Male   | 18 | 6.2 | CO intoxication                            | Ethanol, CO                                        | MDD, Ethanol abuse, Polysubstance abuse |
| 17. | SUICIDE | 44 | White | Female | 30 | 7.2 | Drug overdose, Ethanol intoxication        | Fluoxetine, Ethanol                                | MDD, Ethanol abuse, Opioid abuse        |
| 18. | SUICIDE | 74 | White | Female | 27 | 7.0 | Venlafaxine overdose                       | Venlafaxine, Ethanol                               | MDD, Ethanol abuse                      |
| 19. | SUICIDE | 25 | White | Male   | 14 | 6.8 | Hanging                                    | Ethanol                                            | MDD                                     |
| 20. | SUICIDE | 23 | Black | Male   | 23 | 6.9 | Hanging                                    | None                                               | MDD                                     |
| 21. | SUICIDE | 63 | White | Male   | 19 | 6.9 | Drug overdose, Ethanol intoxication        | Ethanol                                            | MDD                                     |
| 22. | SUICIDE | 67 | White | Male   | 22 | 7.0 | GSW                                        | Fluoxetine, Venlafaxine                            | MDD                                     |
| 23. | SUICIDE | 40 | White | Female | 20 | 7.0 | Drug overdose                              | Alprazolam                                         | MDD                                     |
| 24. | SUICIDE | 53 | White | Male   | 26 | 7.1 | Suicide by stab wound                      | Sertraline                                         | MDD                                     |
|     |         |    |       |        |    |     |                                            |                                                    |                                         |

ASCVD, atherosclerotic cardiovascular disease; CO, carbon monoxide; GSW, gunshot wound; MDD, major depressive disorder; MVA, motor vehicle accident

<sup>a</sup> Mean ± SD age is 42.08 ± 15.35 years; PMI is 16.54 ± 6.56 hours; brain pH is 7.02 ± 0.15; 7 Black, 17 White; 20 Males, 4 Females

<sup>b</sup> Mean ± SD age is 38.96 ± 15.40 years; PMI is 18.92 ± 6.02 hours; brain pH is 6.96 ± 0.25; 2 Black, 22 White; 14 Males, 10 Females
